# Supplementary material for: Landscapes of binding antibody and T-cell responses to pox-protein HIV vaccines in Thais and South Africans
Source: PubMed Central journal article supplement (PMC6992005; doi:10.1371/journal.pone.0226803), 2020-01-30

**A) Non-responders**

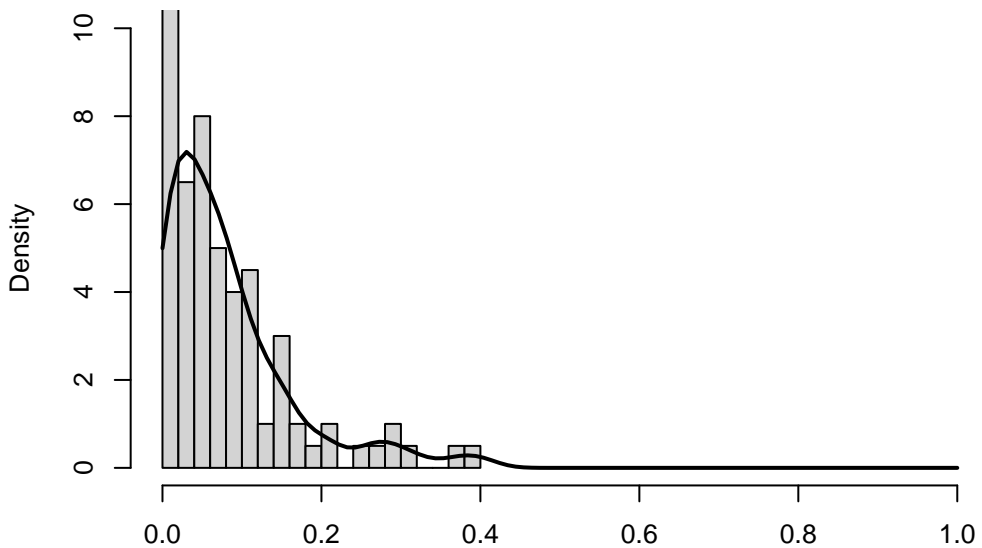

**B) Responders**

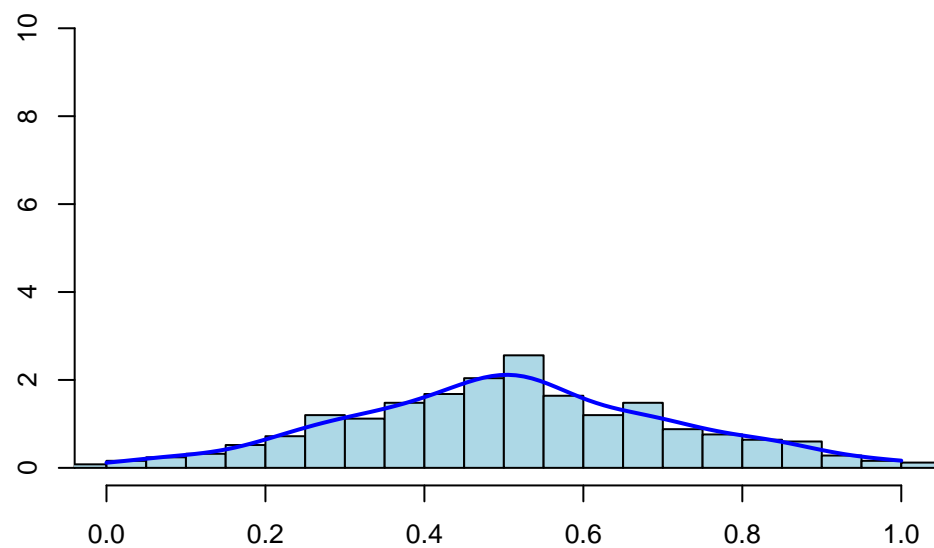

**C) Responders and Non-responders**

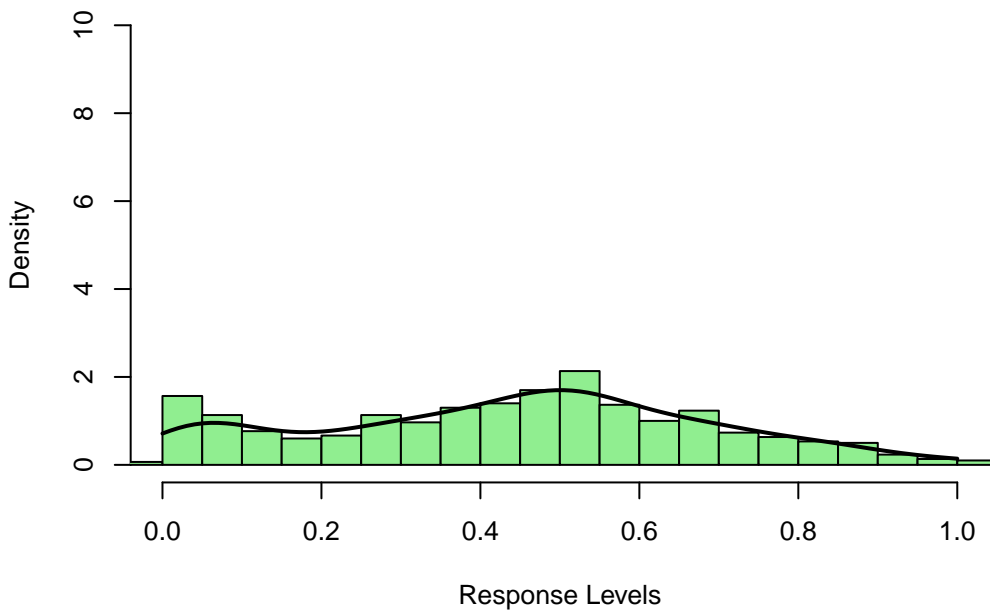

**D) Bi-Directional Power Transform**

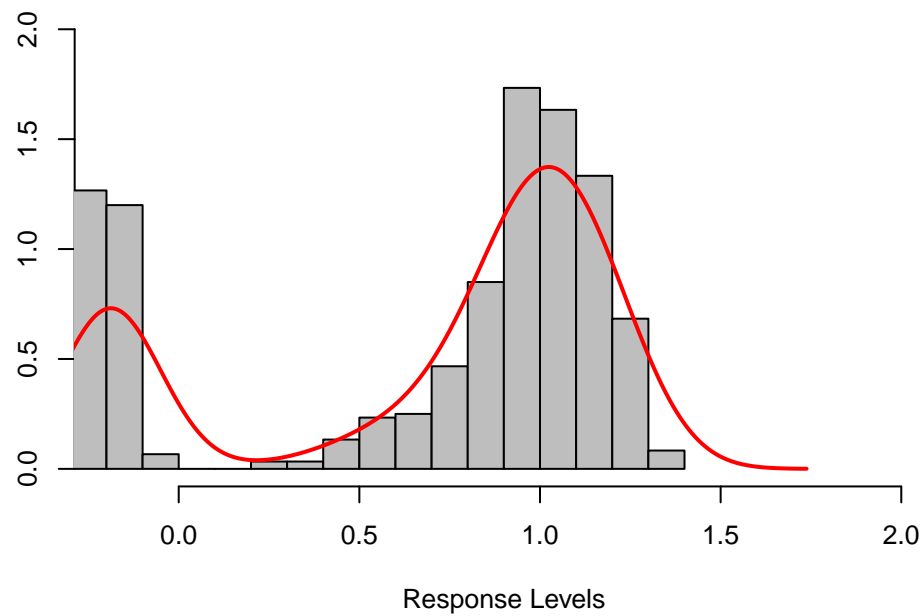

Supplement: pone.0226803.s001.pdf [file pone.0226803.s001.pdf]
