# Supplementary material for: Landscapes of binding antibody and T-cell responses to pox-protein HIV vaccines in Thais and South Africans
Source: PLoS One. 2020 Jan 30;15(1):e0226803. doi: 10.1371/journal.pone.0226803 (PMC6992005; doi:10.1371/journal.pone.0226803)
Supplement: S1 Table — (XLSX) [file pone.0226803.s003.xlsx]

## Sheet: S1 Table
		S1 Table. A list of the 64 immune responses shared by the RV144, HVTN 097, and HVTN 100 studies
		ID	Full Immune Response Name	Assay Type	Gene	Antigen	Clade	Vaccine-Antigen Match
								RV144	HVTN 097	HVTN 100
		1	CD4+ TV1 gp120 CD154+	ICS	gp120	CD154+	C	No Match	No Match	Match
		2	CD4+ TV1 gp120 IFNg+	ICS	gp120	IFNg+	C	No Match	No Match	Match
		3	CD4+ TV1 gp120 IFNg\IL2\CD154	ICS	gp120	IFNg\IL2\CD154	C	No Match	No Match	Match
		4	CD4+ TV1 gp120 IL2+	ICS	gp120	IL2+	C	No Match	No Match	Match
		5	CD4+ TV1 gp120 IL2/IFNg	ICS	gp120	IL2/IFNg	C	No Match	No Match	Match
		6	CD4+ ZM96 gp120 CD154+	ICS	gp120	CD154+	C	No Match	No Match	Match
		7	CD4+ ZM96 gp120 IFNg+	ICS	gp120	IFNg+	C	No Match	No Match	Match
		8	CD4+ ZM96 gp120 IFNg\IL2\CD154	ICS	gp120	IFNg\IL2\CD154	C	No Match	No Match	Match
		9	CD4+ ZM96 gp120 IL2+	ICS	gp120	IL2+	C	No Match	No Match	Match
		10	CD4+ ZM96 gp120 IL2/IFNg	ICS	gp120	IL2/IFNg	C	No Match	No Match	Match
		11	CD8+ TV1 gp120 CD154+	ICS	gp120	CD154+	C	No Match	No Match	Match
		12	CD8+ TV1 gp120 IFNg+	ICS	gp120	IFNg+	C	No Match	No Match	Match
		13	CD8+ TV1 gp120 IFNg\IL2\CD154	ICS	gp120	IFNg\IL2\CD154	C	No Match	No Match	Match
		14	CD8+ TV1 gp120 IL2+	ICS	gp120	IL2+	C	No Match	No Match	Match
		15	CD8+ TV1 gp120 IL2/IFNg	ICS	gp120	IL2/IFNg	C	No Match	No Match	Match
		16	CD8+ ZM96 gp120 CD154+	ICS	gp120	CD154+	C	No Match	No Match	Match
		17	CD8+ ZM96 gp120 IFNg+	ICS	gp120	IFNg+	C	No Match	No Match	Match
		18	CD8+ ZM96 gp120 IFNg\IL2\CD154	ICS	gp120	IFNg\IL2\CD154	C	No Match	No Match	Match
		19	CD8+ ZM96 gp120 IL2+	ICS	gp120	IL2+	C	No Match	No Match	Match
		20	CD8+ ZM96 gp120 IL2/IFNg	ICS	gp120	IL2/IFNg	C	No Match	No Match	Match
		21	IgG 1086C gp140C_avi 50 Serum	BAMA	gp140	50	C	No Match	No Match	Match
		22	IgG 1086C_D7gp120.avi/293F 50 Serum	BAMA	gp120	50	C	No Match	No Match	Match
		23	IgG 254008_D11gp120.avi/293F 50 Serum	BAMA	gp120	50	CRF01_AE	No Match	No Match	No Match
		24	IgG 51802_D11gp120.avi/293F 50 Serum	BAMA	gp120	50	A1	No Match	No Match	No Match
		25	IgG 9004S.gp140C.avi 50 Serum	BAMA	gp140	50	A	No Match	No Match	No Match
		26	IgG A244 D11gp120_avi 50 Serum	BAMA	gp120	50	CRF01_AE	Match	Match	No Match
		27	IgG AE.01.con_env03 gp140CF_avi 50 Serum	BAMA	gp140	50	CRF01_AE	No Match	No Match	No Match
		28	IgG AE.A244 V1V2 Tags/293F 50 Serum	BAMA	V1V2	50	AE	Match	Match	No Match
		29	IgG B.6240_D11gp120/293F 50 Serum	BAMA	gp120	50	B	No Match	No Match	No Match
		30	IgG BF1266_gp140C.avi/293F 50 Serum	BAMA	gp140	50	C	No Match	No Match	No Match
		31	IgG BJOX002_D11gp120.avi/293F 50 Serum	BAMA	gp120	50	CRF01_AE	No Match	No Match	No Match
		32	IgG BORI_D11gp120.avi/293F 50 Serum	BAMA	gp120	50	B	No Match	No Match	No Match
		33	IgG C.CH505TF_gp140/293F 50 Serum	BAMA	gp140	50	C	No Match	No Match	No Match
		34	IgG CNE20_D11gp120.avi/293F 50 Serum	BAMA	gp120	50	CRF07_BC	No Match	No Match	No Match
		35	IgG Con 6 gp120/B 50 Serum	BAMA	gp120	50	Consensus	No Match	No Match	No Match
		36	IgG Con S gp140 CFI 50 Serum	BAMA	gp140	50	Consensus	No Match	No Match	No Match
		37	IgG RHPA4259_C7.gp140C.avi 50 Serum	BAMA	gp140	50	B	No Match	No Match	No Match
		38	IgG SC42261_gp140.avi/293F 50 Serum	BAMA	gp140	50	B	No Match	No Match	No Match
		39	IgG TT31P.2792_D11gp120.avi/293F 50 Serum	BAMA	gp120	50	B	No Match	No Match	No Match
		40	IgG WITO4160.gp140C.avi 50 Serum	BAMA	gp140	50	B	No Match	No Match	No Match
		41	IgG gp41 50 Serum	BAMA	gp41	50	B	No Match	No Match	No Match
		42	IgG gp70-001428.2.42 V1V2 50 Serum	BAMA	V1V2	50	C	No Match	No Match	No Match
		43	IgG gp70-191084_B7 V1V2 50 Serum	BAMA	V1V2	50	A	No Match	No Match	No Match
		44	IgG gp70-62357.14 V1V2 50 Serum	BAMA	V1V2	50	B	No Match	No Match	No Match
		45	IgG gp70-700010058 V1V2 50 Serum	BAMA	V1V2	50	B	No Match	No Match	No Match
		46	IgG gp70-7060101641 V1V2 50 Serum	BAMA	V1V2	50	C	No Match	No Match	No Match
		47	IgG gp70-96ZM651.02 V1v2 50 Serum	BAMA	V1V2	50	C	No Match	No Match	Match
		48	IgG gp70-BF1266_431a_V1V2 50 Serum	BAMA	V1V2	50	C	No Match	No Match	No Match
		49	IgG gp70-BJOX002000.03.2 V1V2 50 Serum	BAMA	V1V2	50	CRF07_BC	No Match	No Match	No Match
		50	IgG gp70-C2101.c01_V1V2 50 Serum	BAMA	V1V2	50	CRF01_AE	No Match	No Match	No Match
		51	IgG gp70-CAP210.2.00.E8 V1V2 50 Serum	BAMA	V1V2	50	C	No Match	No Match	No Match
		52	IgG gp70-CM244.ec1 V1V2 50 Serum	BAMA	V1V2	50	CRF01_AE	No Match	No Match	No Match
		53	IgG gp70-RHPA4259.7 V1V2 50 Serum	BAMA	V1V2	50	B	No Match	No Match	No Match
		54	IgG gp70-TT31P.2F10.2792 V1V2 50 Serum	BAMA	V1V2	50	B	No Match	No Match	No Match
		55	IgG gp70-TV1.21 V1V2 50 Serum	BAMA	V1V2	50	C	No Match	No Match	No Match
		56	IgG gp70_B.CaseA_V1_V2 50 Serum	BAMA	V1V2	50	B	No Match	No Match	No Match
		57	IgG3 A244 D11gp120_avi 40 Serum	BAMA	gp120	40	CRF01_AE	Match	Match	No Match
		58	IgG3 AE.01.con_env03 gp140CF_avi 40 Serum	BAMA	gp140	40	CRF01_AE	No Match	No Match	No Match
		59	IgG3 AE.A244 V1V2 Tags/293F 40 Serum	BAMA	V1V2	40	AE	Match	Match	No Match
		60	IgG3 C.1086C_V1_V2 Tags 40 Serum	BAMA	V1V2	40	C	No Match	No Match	Match
		61	IgG3 Con 6 gp120/B 40 Serum	BAMA	gp120	40	Consensus	No Match	No Match	No Match
		62	IgG3 Con S gp140 CFI 40 Serum	BAMA	gp140	40	Consensus	No Match	No Match	No Match
		63	IgG3 gp41 40 Serum	BAMA	gp41	40	B	No Match	No Match	No Match
		64	IgG3 gp70_B.CaseA_V1_V2 40 Serum	BAMA	V1V2	40	B	No Match	No Match	No Match
