# Supplementary material for: Landscapes of binding antibody and T-cell responses to pox-protein HIV vaccines in Thais and South Africans
Source: PLoS One. 2020 Jan 30;15(1):e0226803. doi: 10.1371/journal.pone.0226803 (PMC6992005; doi:10.1371/journal.pone.0226803)
Supplement: S2 Table — Left panel, original values; right panel, normalized and transformed values. (XLSX) [file pone.0226803.s004.xlsx]

## Sheet: S2 Table
			S2 Table. Distributional statistics of the 12 immune responses for which vaccine recipients consistently showed limited or no response. Left panel, original values; right panel, normalized and transformed values.
				Original Values								BDPT-Transformed Values
				Mean	SD	Min	0.25	0.5	0.75	Max		Mean	SD	Min	0.25	0.5	0.75	Max
				ICS
			CD8+ TV1 gp120 CD154+	0	0.02	-0.18	-0.01	0	0.01	0.19		-0.82	1.1	-1.52	-1.05	-1	-0.95	9.01
			CD8+ TV1 gp120 IFNg+	0	0.01	-0.05	0	0	0	0.03		-0.87	0.87	-1.47	-1.05	-1	-0.96	6.99
			CD8+ TV1 gp120 IFNg\IL2\CD154	0	0.03	-0.17	-0.01	0	0.01	0.19		-0.81	1.15	-1.48	-1.06	-1	-0.94	9.65
			CD8+ TV1 gp120 IL2+	0	0.01	-0.02	0	0	0	0.04		-0.63	1.49	-1.31	-1.08	-0.98	-0.89	10.04
			CD8+ TV1 gp120 IL2/IFNg	0	0.01	-0.05	0	0	0	0.04		-0.75	1.22	-1.4	-1.05	-0.99	-0.91	8.82
			CD8+ ZM96 gp120 CD154+	0	0.03	-0.11	-0.01	0	0.01	0.34		-0.66	1.42	-1.39	-1.04	-1	-0.93	8.8
			CD8+ ZM96 gp120 IFNg+	0	0.04	-0.04	0	0	0	0.64		-0.73	1.41	-1.32	-1.04	-1	-0.95	13.4
			CD8+ ZM96 gp120 IFNg\IL2\CD154	0.01	0.05	-0.12	-0.01	0	0.01	0.62		-0.84	1.01	-1.25	-1.03	-1	-0.96	8.5
			CD8+ ZM96 gp120 IL2+	0	0.01	-0.02	0	0	0	0.1		-0.29	2.03	-1.32	-1.06	-0.96	-0.83	12.53
			CD8+ ZM96 gp120 IL2/IFNg	0	0.04	-0.04	0	0	0.01	0.64		-0.64	1.58	-1.32	-1.05	-0.99	-0.91	13.87
				BAMA
			IgG gp41 50 Serum	5.58	2.08	0.69	4.62	5.51	6.72	10.32		-0.08	2.13	-1.3	-1.06	-0.97	-0.79	5.76
			IgG3 gp41 40 Serum	3.46	1.57	0.69	2.53	3.32	4.31	10.18		-0.68	1.3	-1.17	-1.05	-0.99	-0.89	7.28
